# Supplementary material for: PEGylated Prussian blue nanoparticles for modulating polyethyleneimine cytotoxicity and attenuating tumor hypoxia for dual-enhanced photodynamic therapy
Source: Royal Society of Chemistry journal article supplement (doi:10.1039/d2tb00571a), 2022-01-01
Supplement: d2tb00571a1.pdf [file d2tb00571a1.pdf]

ARTICLE

**Supporting Information**

**PEGylated Prussian blue nanoparticles with modulating polyethyleneimine cytotoxicity and attenuating tumor hypoxia for dual-enhanced photodynamic therapy**

Huanhuan Wang,<sup>a,b</sup> Rumeng Qu,<sup>a,b</sup> Qi Chen,<sup>a,b</sup> Ting Zhang,<sup>a,b</sup> Xiaoyu Chen,<sup>a,b</sup> Baoyan Wu<sup>\*a,b,c</sup> and Tongsheng Chen<sup>\*a,b,d</sup>

<sup>a</sup>MOE Key Laboratory of Laser Life Science & Institute of Laser Life Science, College of Biophotonics, South China Normal University, Guangzhou 510631, China. E-mail: wubaoyan@scnu.edu.cn; chentsh@scnu.edu.cn

<sup>b</sup>Guangdong Provincial Key Laboratory of Laser Life Science, College of Biophotonics, South China Normal University, Guangzhou 510631, China

<sup>c</sup>Guangzhou Key Laboratory of Spectral Analysis and Functional Probes, College of Biophotonics, South China Normal University, Guangzhou 510631, China

<sup>d</sup>SCNU Qingyuan Institute of Science and Technology Innovation Co., Ltd., Qingyuan 511517, China

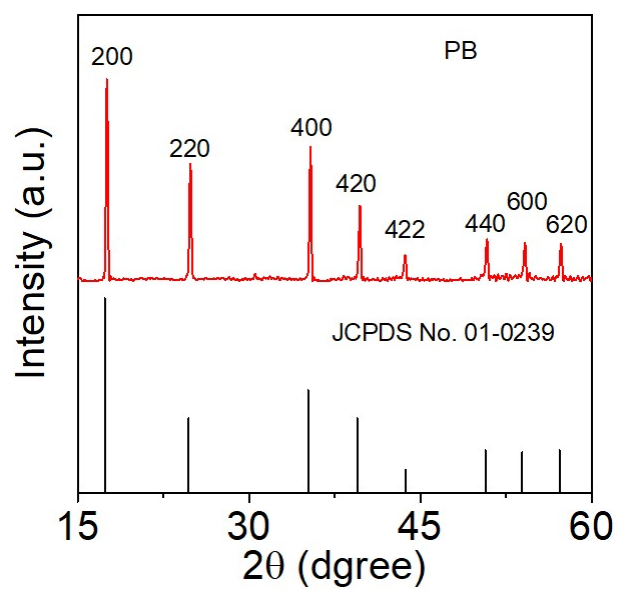

Fig. S1 XRD pattern of PB powder.

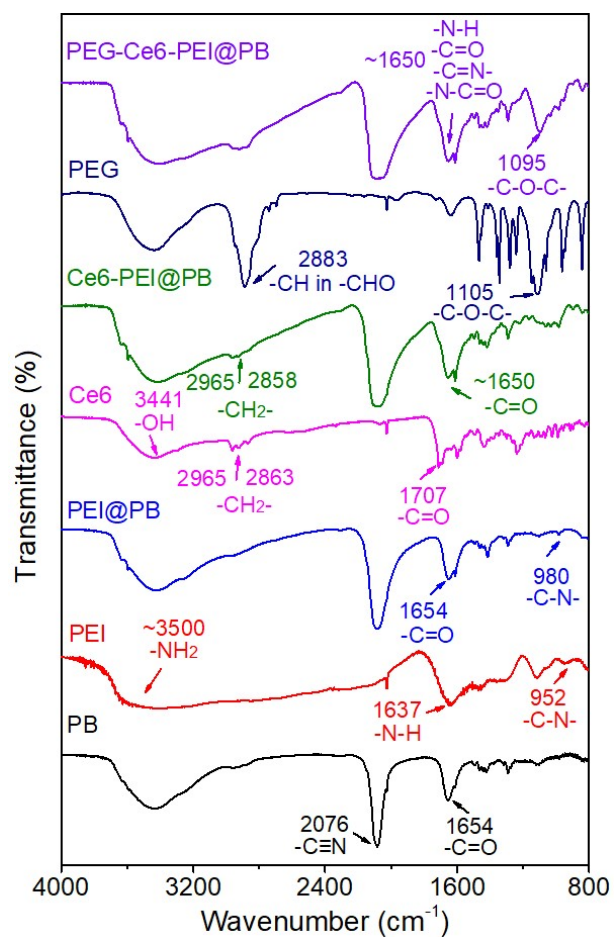

**Fig. S2** FTIR spectra of PB, PEI, PEI@PB, Ce6, Ce6-PEI@PB, PEG, and PEG-Ce6-PEI@PB.

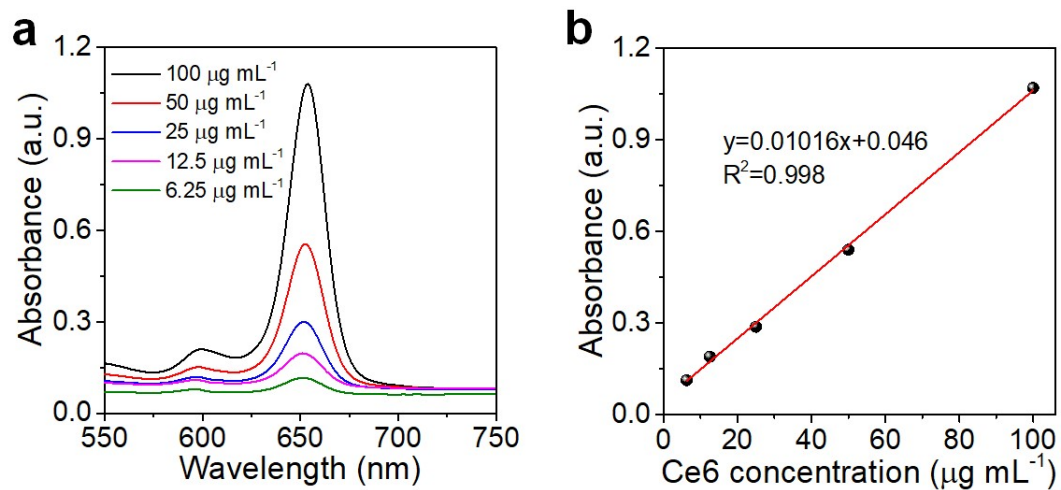

**Fig. S3** The quantification curves of Ce6. (a) The UV-vis spectra of Ce6 with different concentrations. (b) The standard curve of Ce6 absorbance value at 655 nm.

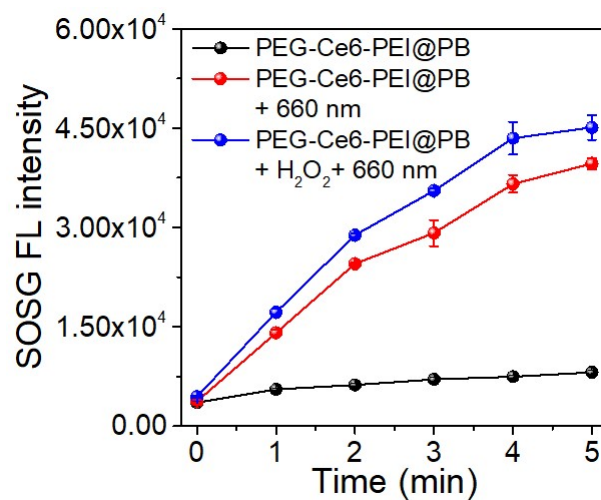

**Fig. S4** Single oxygen generation of PEG-Ce6-PEI@PB with H<sub>2</sub>O<sub>2</sub> upon 660 nm irradiation, as indicated by the FL intensity of SOSG. Data presented as mean  $\pm$  SD (n = 3).

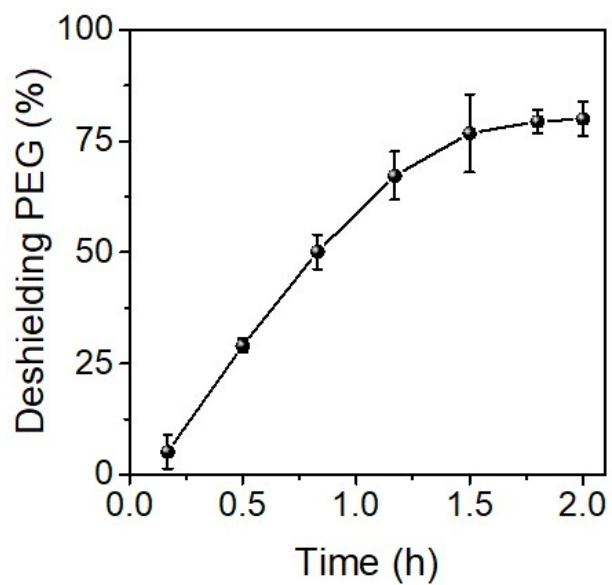

**Fig. S5** PEG deshielding percentage from PEG-Ce6-PEI@PB at pH 6.8 for different durations. Data presented as mean  $\pm$  SD ( $n = 3$ ).

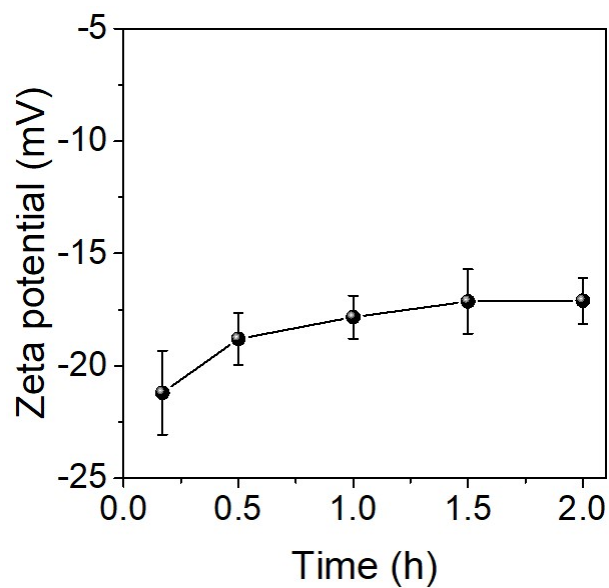

**Fig. S6** Zeta potential of PEG-Ce6-PEI@PB at pH 6.8. Data presented as mean  $\pm$  SD (n = 3).

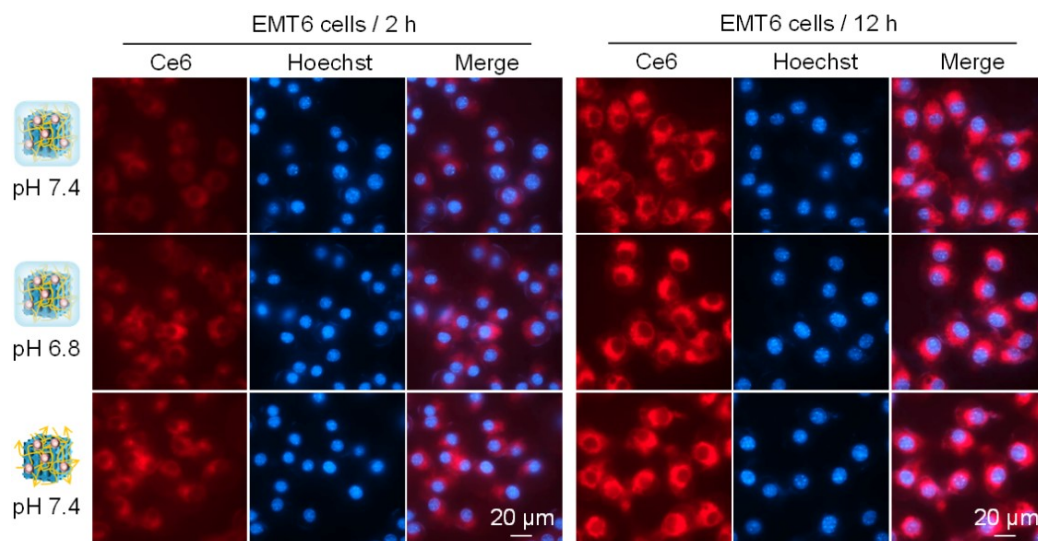

**Fig. S7** PEG shedding to enhance endocytosis of PEG-Ce6-PEI@PB triggered by weak acid in EMT6 cells after incubation for 2 h and 12 h, respectively.



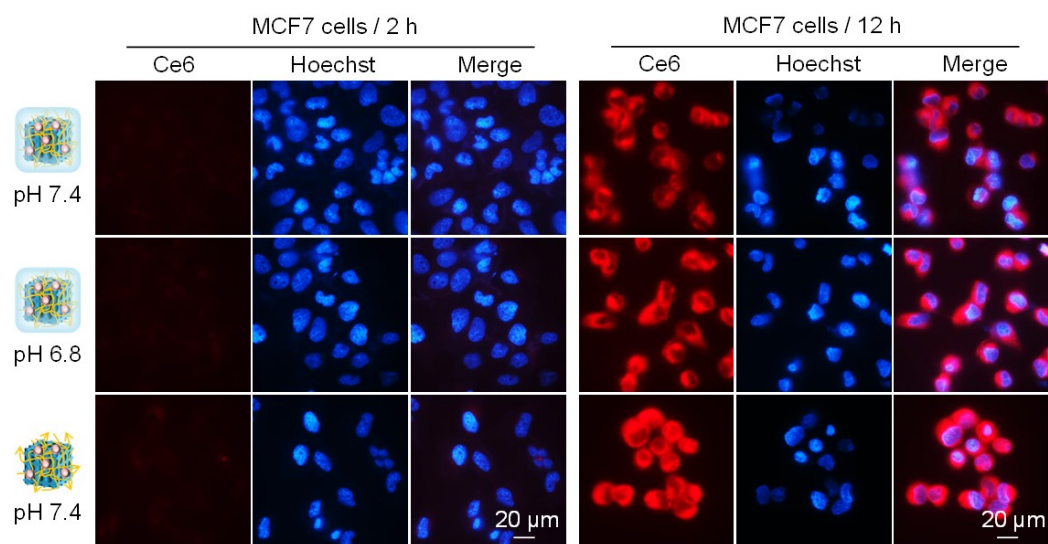

**Fig. S8** PEG shedding to enhance endocytosis of PEG-Ce6-PEI@PB triggered by weak acid in MCF7 cells after incubation for 2 h and 12 h, respectively.

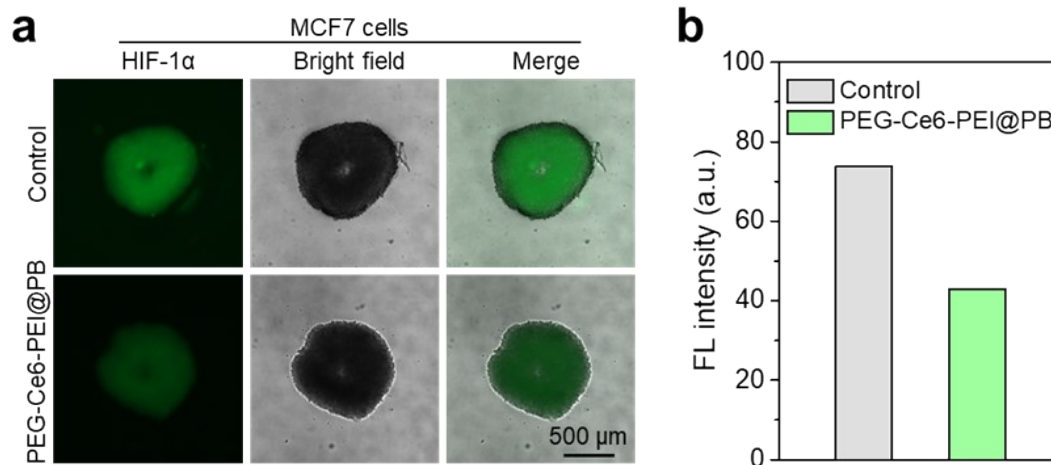

**Fig. S9** The ability of PEG-Ce6-PEI@PB on attenuating hypoxia in multicellular tumor spheroids. (a) Hypoxia was assessed by immunofluorescence staining with HIF-1 $\alpha$  (green) after 24 h treatment. (b) Corresponding fluorescence intensity of HIF-1 $\alpha$  in a.

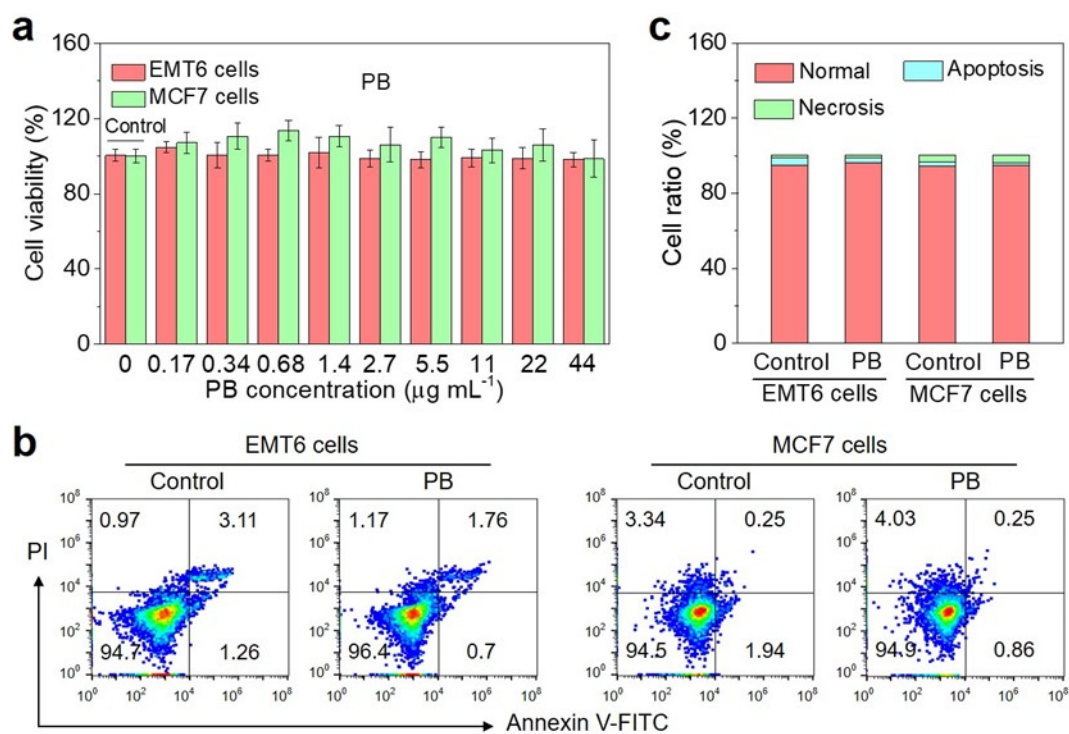

**Fig. S10** *In vitro* biocompatibility of PB in EMT6 and MCF7 cells. (a) Cell viability assay of EMT6 and MCF7 cells treated with different concentrations of PB. Data presented as mean  $\pm$  SD ( $n = 3$ ). (b) Apoptosis/necrosis analyzed by flow cytometry in EMT6 and MCF7 cells using Annexin V-FITC and PI double staining. (c) Quantitative analysis of corresponding cell apoptosis/necrosis percentages based on b.

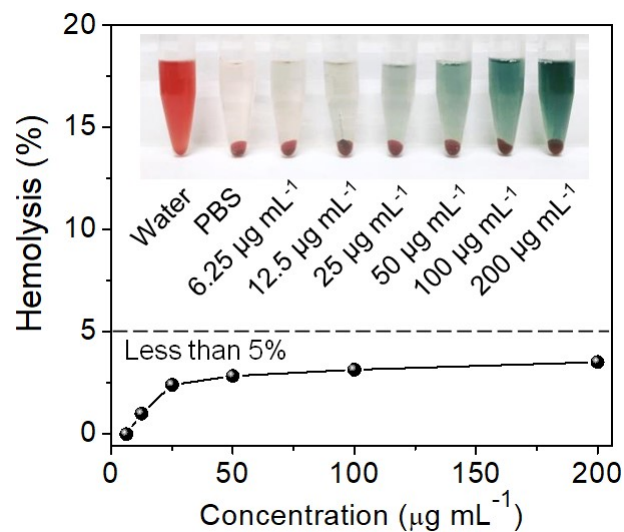

**Fig. S11** Hemolysis analysis of PEG-Ce6-PEI@PB suspension at various concentrations with red blood cells incubation. Inset: Hemolysis photographs after centrifugation. Water and PBS were used as positive and negative controls, respectively.

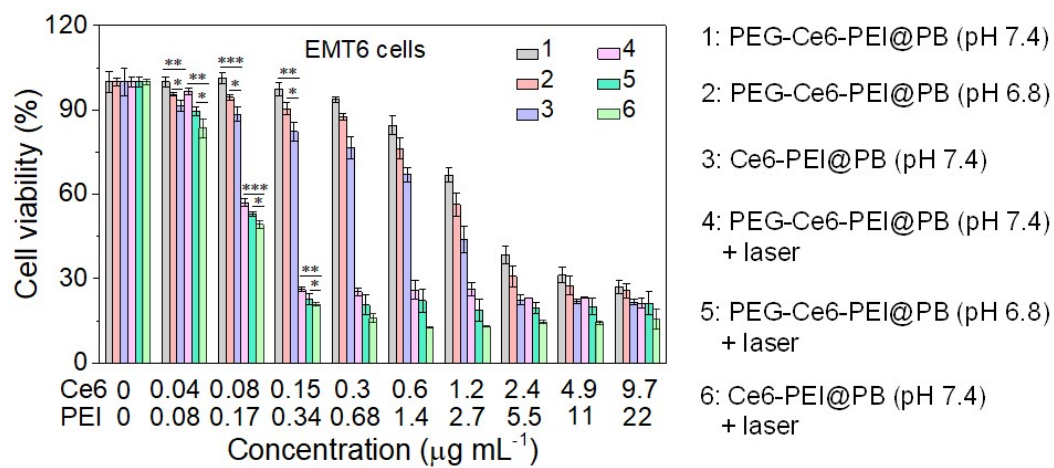

**Fig. S12** Cell viability assay of EMT6 cells after incubation with PEG-Ce6-PEI@PB and Ce6-PEI@PB with and without 660 nm laser irradiation ( $34 \text{ mW cm}^{-2}$ , 12 min). Data presented as mean  $\pm$  SD ( $n = 3$ ). \* $P < 0.05$ , \*\* $P < 0.01$ , \*\*\* $P < 0.001$ .

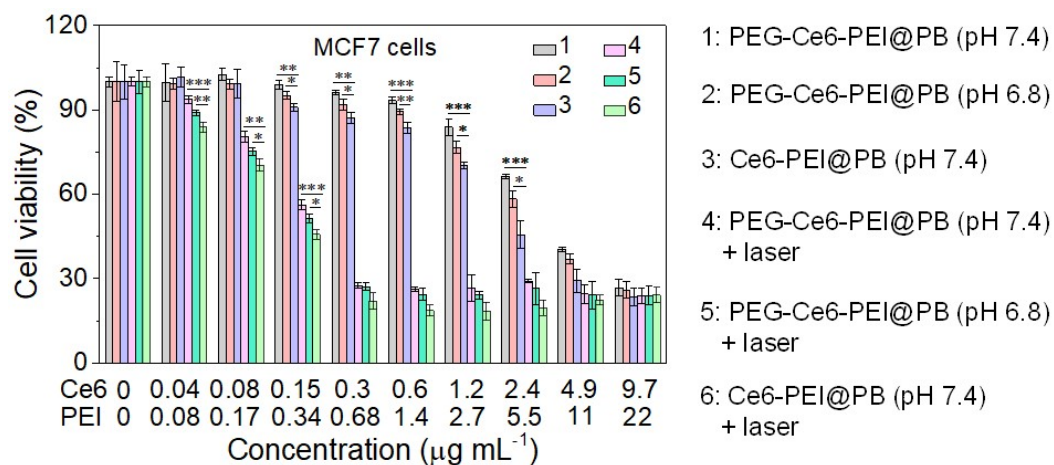

**Fig. S13** Cell viability assay of MCF7 cells after incubation with PEG-Ce6-PEI@PB and Ce6-PEI@PB with and without 660 nm laser irradiation ( $34 \text{ mW cm}^{-2}$ , 12 min). Data presented as mean  $\pm$  SD ( $n = 3$ ). \* $P < 0.05$ , \*\* $P < 0.01$ , \*\*\* $P < 0.001$ .

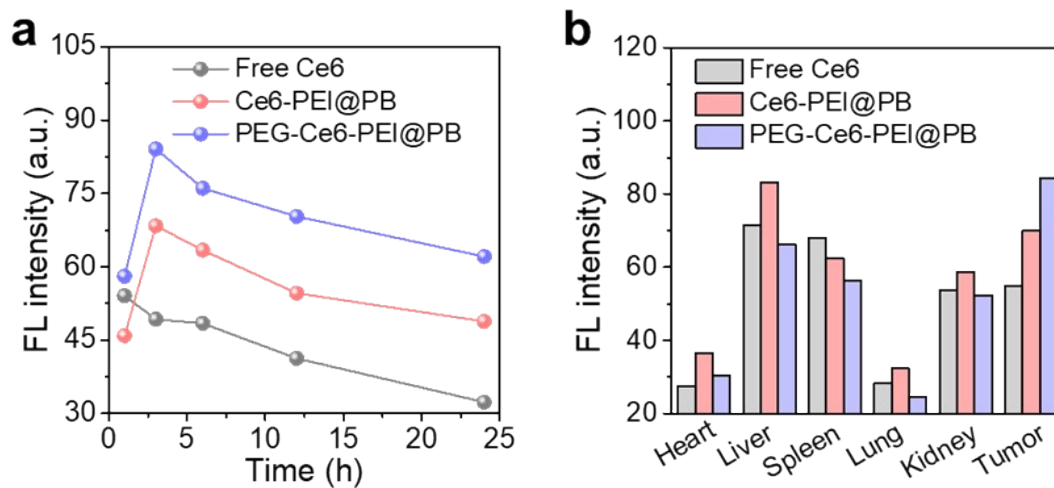

**Fig. S14** *In vivo* bio-distribution of PEG-Ce6-PEI@PB. (a) Corresponding tumor-site fluorescence intensity of free Ce6, Ce6-PEI@PB, and PEG-Ce6-PEI@PB *in vivo*. (b) Corresponding fluorescence intensity of major organs and tumors *ex vivo*.

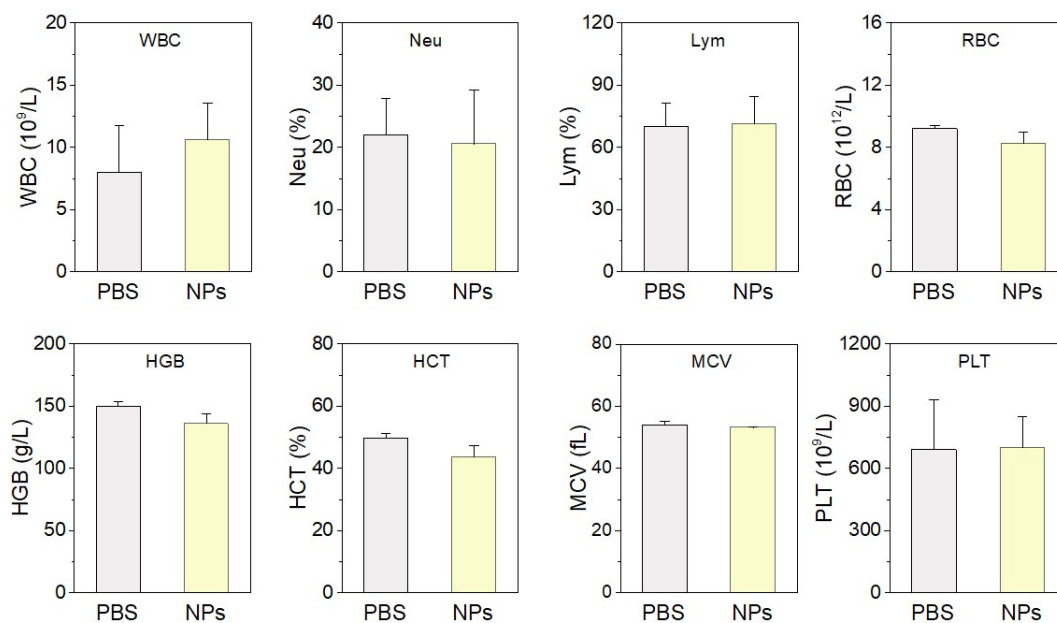

**Fig. S15** Blood hematology analyses of healthy mice after intravenous injection with PEG-Ce6-PEI@PB nanoparticles. Key indicators of the white cell system: WBC = white blood cell count, Neu = neutrophil, Lym = lymphocyte. Key indicators of the red blood cell system: RBC = red blood cell count, HGB = hemoglobin, HCT = hematocrit, MCV = mean corpuscular volume. Key indicators of the platelet system: PLT = platelet. Data presented as mean  $\pm$  SD ( $n = 3$ ).



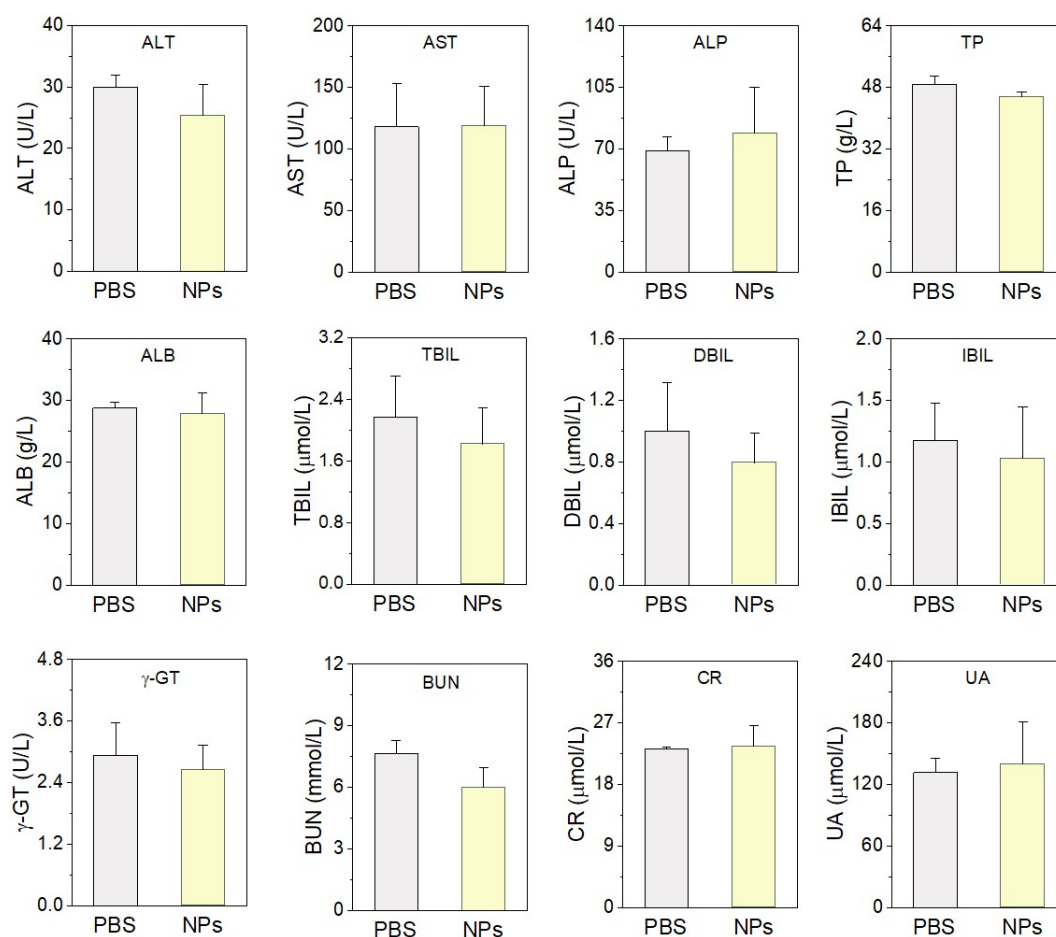

**Fig. S16** Blood biochemistry analyses of healthy mice after intravenous injection with PEG-Ce6-PEI@PB nanoparticles. Liver function examination main index: ALT = alanine aminotransferase, AST = aspartate transaminase, ALP = alkaline phosphate, TP = total protein, ALB = albumin, TBIL = total bilirubin, DBIL = direct bilirubin, IBIL = indirect bilirubin,  $\gamma$ -GT =  $\gamma$ -glutamyltransferase. Renal function examination main index: BUN = blood urea nitrogen, CR = creatinine, UA = uric acid. Data presented as mean  $\pm$  SD (n = 3).

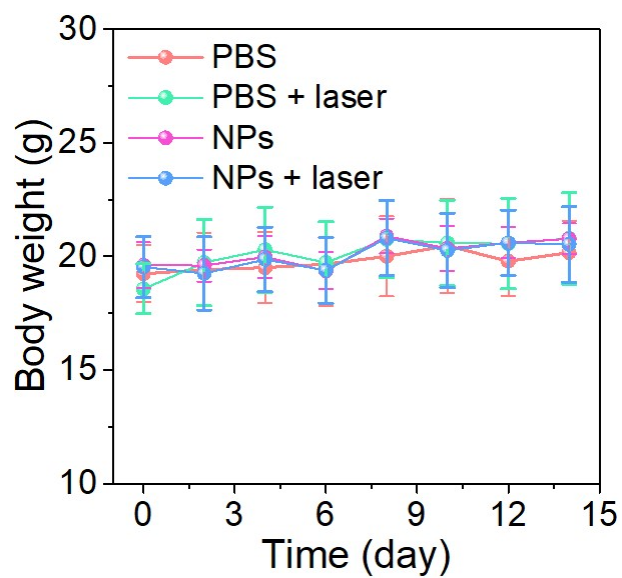

**Fig. S17** Body weight changes of the tumor-bearing mice measured during the antitumor studies. Data presented as mean  $\pm$  SD (n = 5).

**Table S1** IC<sub>50</sub> (half maximal inhibitory concentration) of PEI and Ce6 in several samples for EMT6 cells.

| Samples            | IC <sub>50</sub> of PEI [ $\mu\text{g mL}^{-1}$ ] | IC <sub>50</sub> of Ce6 [ $\mu\text{g mL}^{-1}$ ] |
|--------------------|---------------------------------------------------|---------------------------------------------------|
| PEI@PB             | 15.161                                            | —                                                 |
| Ce6@PB + laser     | —                                                 | 0.162                                             |
| Ce6-PEI@PB + laser | 0.175                                             | 0.078                                             |

**Table S2** IC<sub>50</sub> of PEI and Ce6 in several samples for MCF7 cells.

| Samples            | IC <sub>50</sub> of PEI [ $\mu\text{g mL}^{-1}$ ] | IC <sub>50</sub> of Ce6 [ $\mu\text{g mL}^{-1}$ ] |
|--------------------|---------------------------------------------------|---------------------------------------------------|
| PEI@PB             | 18.625                                            | —                                                 |
| Ce6@PB + laser     | —                                                 | 0.199                                             |
| Ce6-PEI@PB + laser | 0.290                                             | 0.129                                             |
